## Correction: Aloeemodin as drug candidate for cancer therapy

Nadire Özenver<sup>1</sup>, Mohamed Saeed<sup>2</sup>, Lütfiye Ömur Demirezer<sup>1</sup> and Thomas Efferth<sup>2</sup>

<sup>1</sup>Department of Pharmacognosy, Faculty of Pharmacy, Hacettepe University, 06100 Ankara, Turkey

<sup>2</sup>Department of Pharmaceutical Biology, Institute of Pharmacy and Biochemistry, Johannes Gutenberg University, 55128 Mainz, Germany

**Published:** April 24, 2026

**Copyright:** © 2026 Özenver et al. This is an open access article distributed under the terms of the [Creative Commons Attribution License](#) (CC BY 4.0), which permits unrestricted use, distribution, and reproduction in any medium, provided the original author and source are credited.

**This article has been corrected:** In Figure 9A, the flow cytometry plot for  $4 \times IC_{50}$  was unintentionally repeated instead of the  $2 \times IC_{50}$  plot. This has been corrected using the original data.

Additionally, the authors identified two errors in Figure 9C. First, the column graph for the 0.1  $\mu M$  doxorubicin concentration was found to be inconsistent with its corresponding flow cytometry plot. Second, the column graph for the 1  $\mu M$  doxorubicin concentration incorrectly indicated a percentage of AV-/PI- cell population of 1% instead of the 0.1% shown in the flow cytometry plot. Both graphs in Figure 9C have now been corrected to accurately reflect the relevant flow cytometry data. These corrections do not change the conclusions of the paper. The authors apologize for any inconvenience caused.

The corrected Figure 9 is presented below.

Original article: Oncotarget. 2018; 9:17770–17796. <https://doi.org/10.18632/oncotarget.24880>

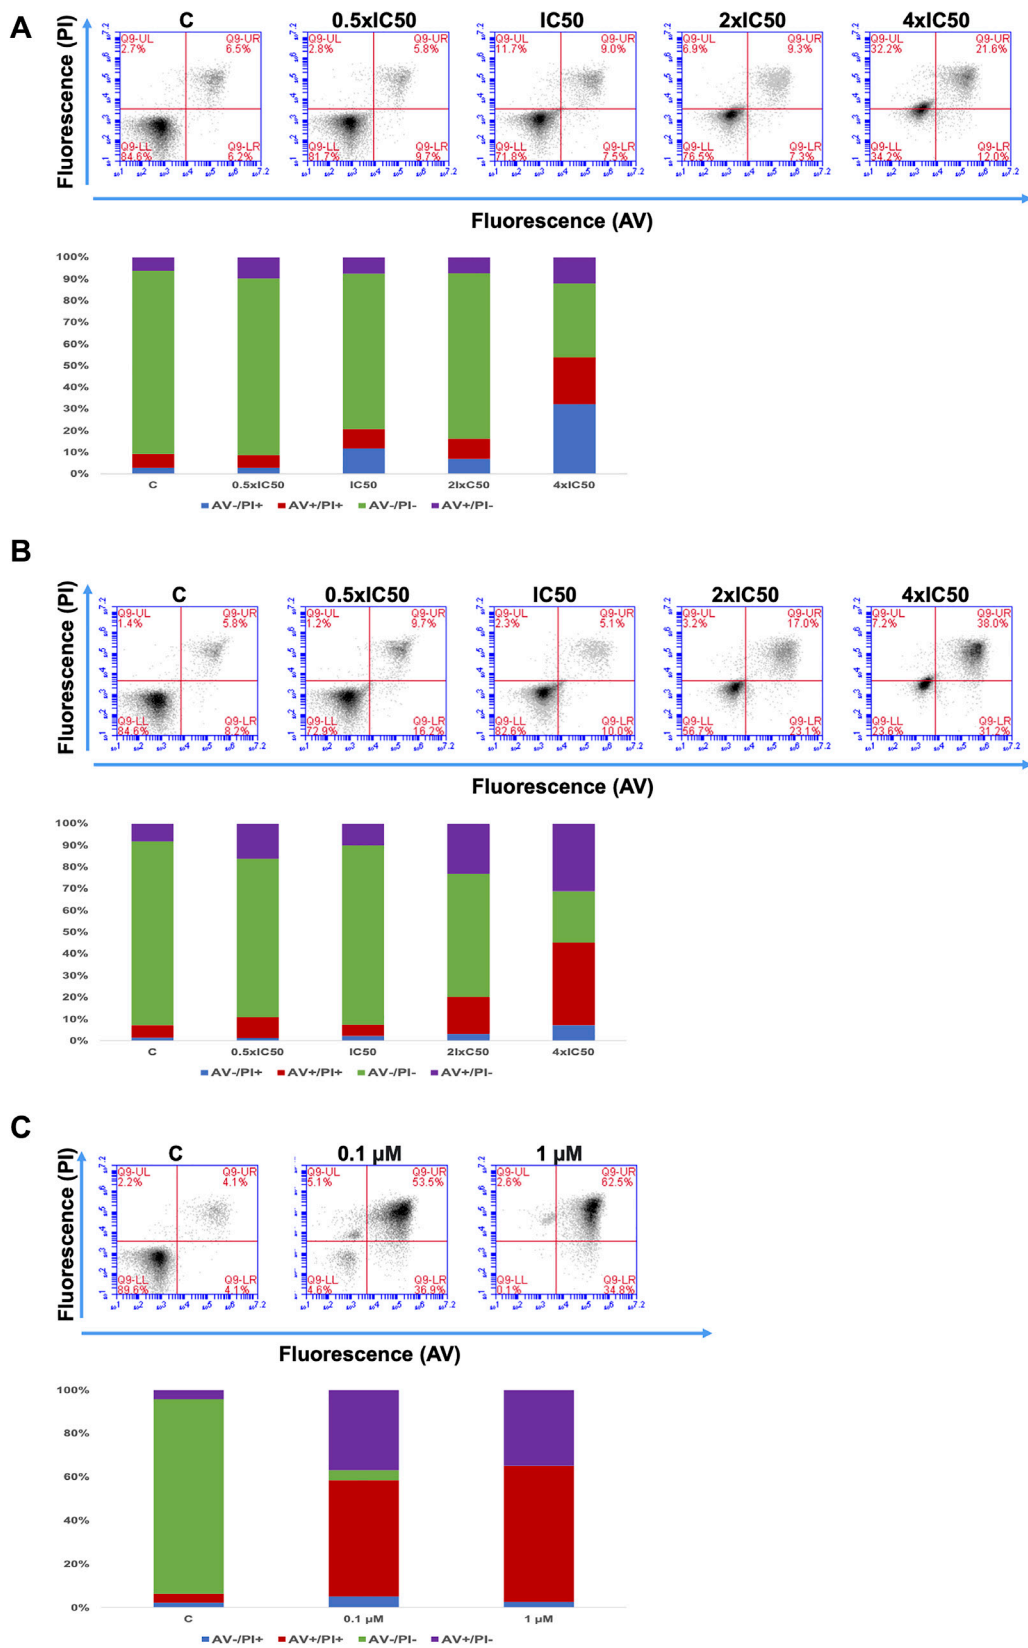

**Figure 9:** Apoptosis effect in CCRF-CEM cells of Aloe-emodin for 72 h (A) and 96 h (B) and of doxorubicin for 72 h (C).
